## ERRATUM

*Journal of Experimental Biology*, 55, p. 181

LERNER, J., MELLEN, S. A., WALDRON, I. and FACTOR, R. M.

Neural redundancy and regularity of swimming beats  
in scyphozoan medusae

In Fig. 2 the histogram for the 'Expected distribution of intervals in the whole jellyfish' has been drawn one bin to the left of its correct location. The per cent of expected intervals should be 0% for  $0-\frac{1}{2}$  s, 46% for  $\frac{1}{2}-1$  s, 45% for  $1-1\frac{1}{2}$  s, 8% for  $1\frac{1}{2}-2$  s, and 1% for  $2-2\frac{1}{2}$  s.
